# Supplementary material for: Radiosensitizing molybdenum iodide nanoclusters conjugated with a biocompatible N-(2-hydroxypropyl)methacrylamide copolymer: a step towards radiodynamic therapy
Source: Royal Society of Chemistry journal article supplement (doi:10.1039/d3ma00577a), 2023-01-01

## Electronic supporting information

# Radiosensitizing molybdenum-iodide nanoclusters conjugated with a biocompatible N-(2-hydroxypropyl)methacrylamide copolymer: a step towards radiodynamic therapy

*Kaplan Kirakci,<sup>a,\*</sup> Robert Pola,<sup>b,\*</sup> Marina Rodrigues Tavares,<sup>b</sup> Michal Pechar,<sup>b</sup> Tomáš Přebyl,<sup>c</sup> Ivana Křížová,<sup>c</sup> Jaroslav Zelenka,<sup>c</sup> Tomáš Ruml,<sup>c</sup> Tomáš Etrych<sup>b</sup> and Kamil Lang<sup>a</sup>*

*<sup>a</sup>Institute of Inorganic Chemistry of the Czech Academy of Sciences, 250 68 Husinec-Řež, Czech Republic.*

*<sup>b</sup>Institute of Macromolecular Chemistry of the Czech Academy of Sciences, Heyrovského náměstí 2, 162 00 Prague 6, Czech Republic.*

*<sup>c</sup>Department of Biochemistry and Microbiology, University of Chemistry and Technology Prague, Technická 5, 166 28 Praha 6, Czech Republic.*

### Content

**Figure S1.** Size distributions by number of **1** and **2** obtained by dynamic light scattering.

**Figure S2.** Phosphorescence signal of O<sub>2</sub>(<sup>1</sup>Δ<sub>g</sub>) produced by **1** and **2** in oxygen-saturated PBS.

**Figure S3.** Phosphorescence emission spectra and decay kinetics of fresh and 8-days old PBS dispersions of **1** and **2**.

**Figure S4.** Toxicity and phototoxicity of **1** and **2** toward HeLa cells, 24 h loading in the absence of FBS.

**Figure S5.** Time and concentration dependent uptake of **2** in HeLa cells by flow cytometry.

**Figure S6.** Cellular colocalization of **1** in HeLa cells.

**Figure S7.** Radiotoxicity of **1** towards HeLa cells.

**Figure S1.** Size distributions by number of fresh (red) and 8-days old (green, in the case of **1** the formation of large aggregates was observed) PBS dispersions of **1** and **2** at room temperature, as obtained by dynamic light scattering.

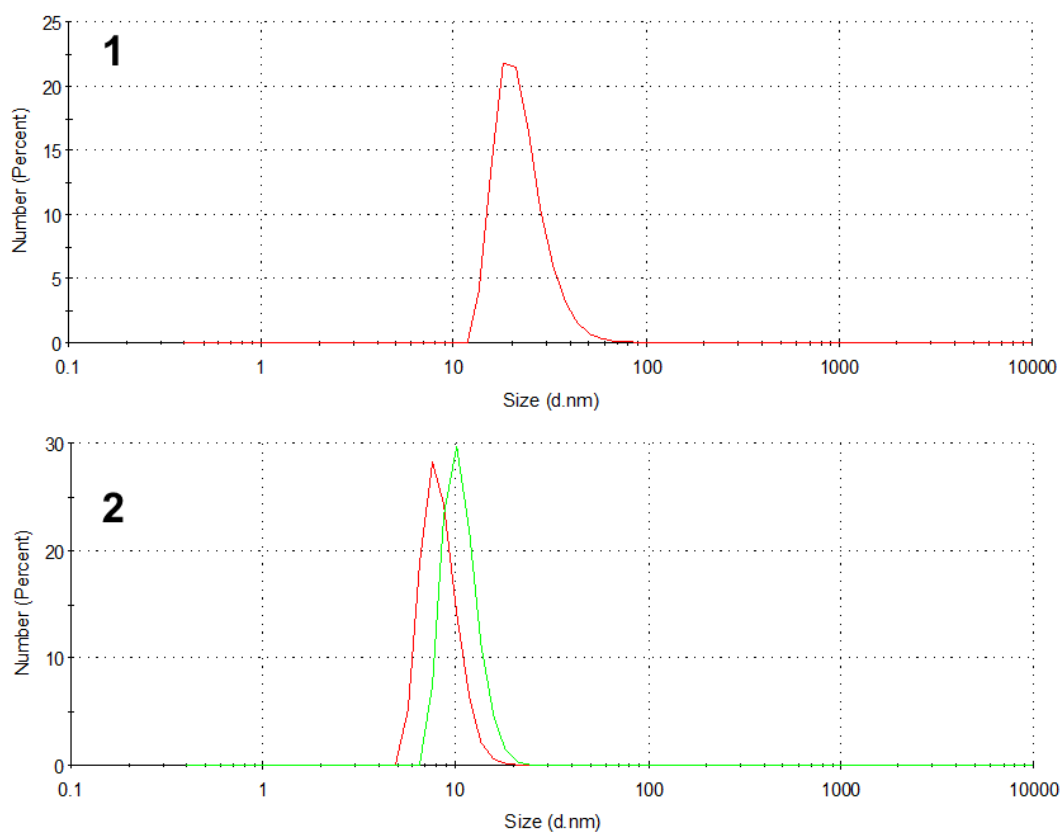

**Figure S2.** Phosphorescence signal of  $O_2(^1\Delta_g)$  produced by **1** and **2** in oxygen-saturated PBS, excited at 400 nm.

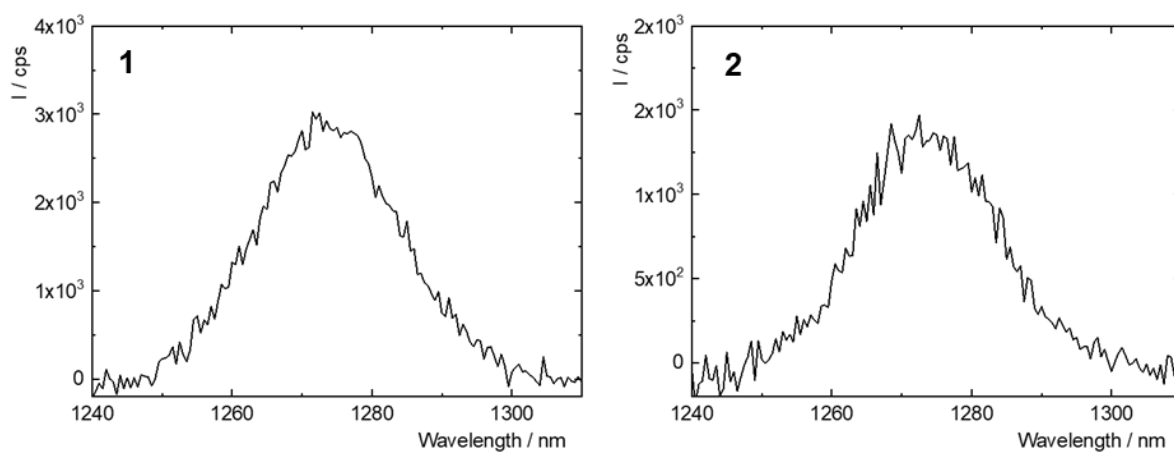

**Figure S3.** Top: Phosphorescence emission spectra of fresh (black) and 8-days old (red) PBS dispersions of **1** and **2**, excited at 400 nm. Bottom: Phosphorescence decay kinetics recorded at 700 nm of fresh (black) and 8-days old (red) PBS dispersions of **1** and **2**, excited at 405 nm.

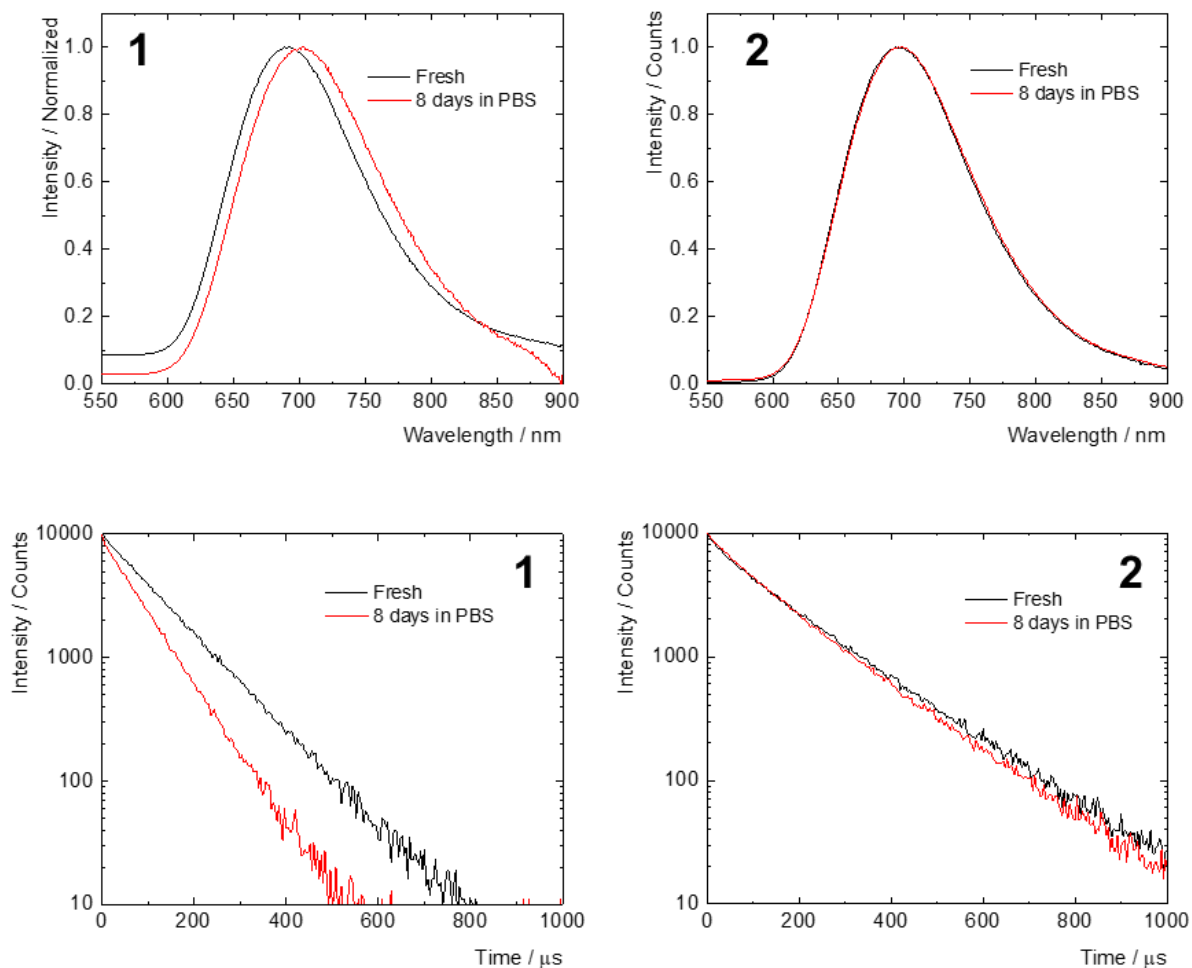

**Figure S4.** Toxicity of **1** and **2** toward HeLa cells in media with indicated concentration; **(A)** dark toxicity, 24 h loading without FBS; **(B)** phototoxicity, 24 h loading without FBS, illuminated with 460 nm light ( $18 \text{ mW cm}^{-2}$ , 15 min).

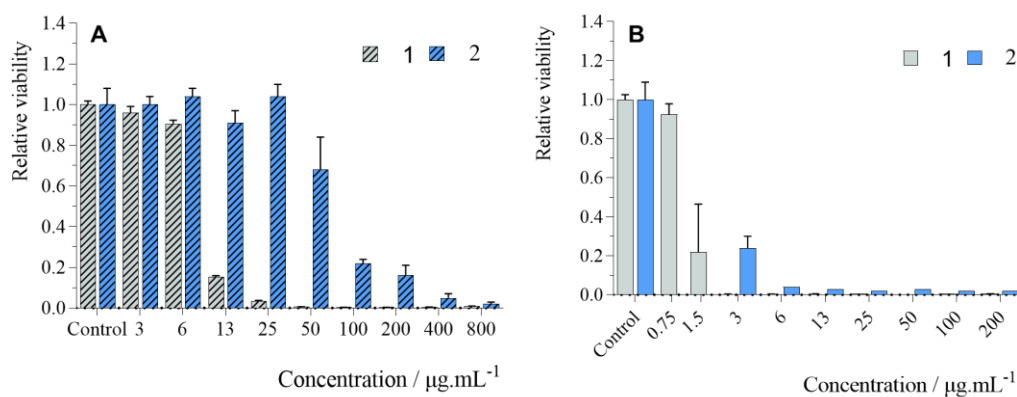

**Figure S5.** Uptake of **2** in HeLa cells analyzed by flow cytometry: (A) incubation times 1, 4, and 24 h, concentration of **2** was 0.4 mg mL<sup>-1</sup>. (B) incubation time was 24 h, concentrations of **2** in the range of 0.1-0.4 mg mL<sup>-1</sup>.

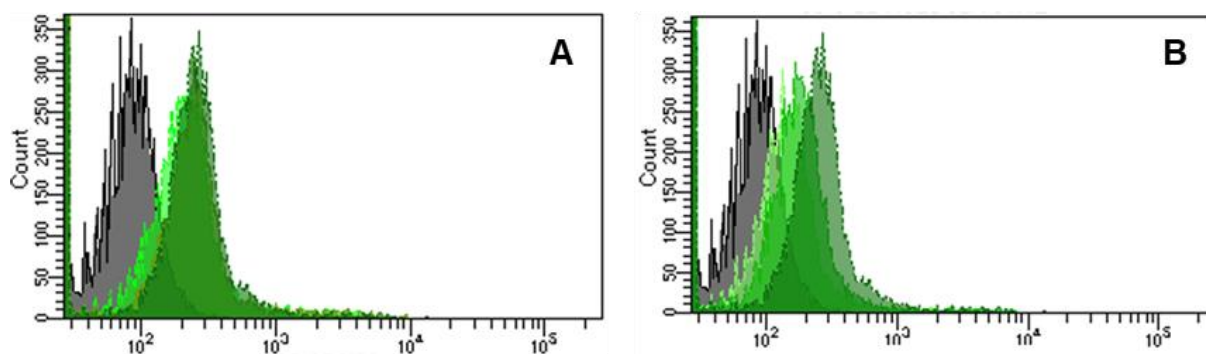

**Figure S6.** Cellular colocalization of **1** in HeLa cells obtained by confocal laser scanning microscopy. (A) WGA-FITC, green: cell membrane; Mo<sub>6</sub>, red: cluster; Merge: cell membrane and cluster together. (B) LysoTracker, green: lysosomes; Mo<sub>6</sub>, red: cluster; Merge: lysosomes and cluster together. White bars represent 10 μm.

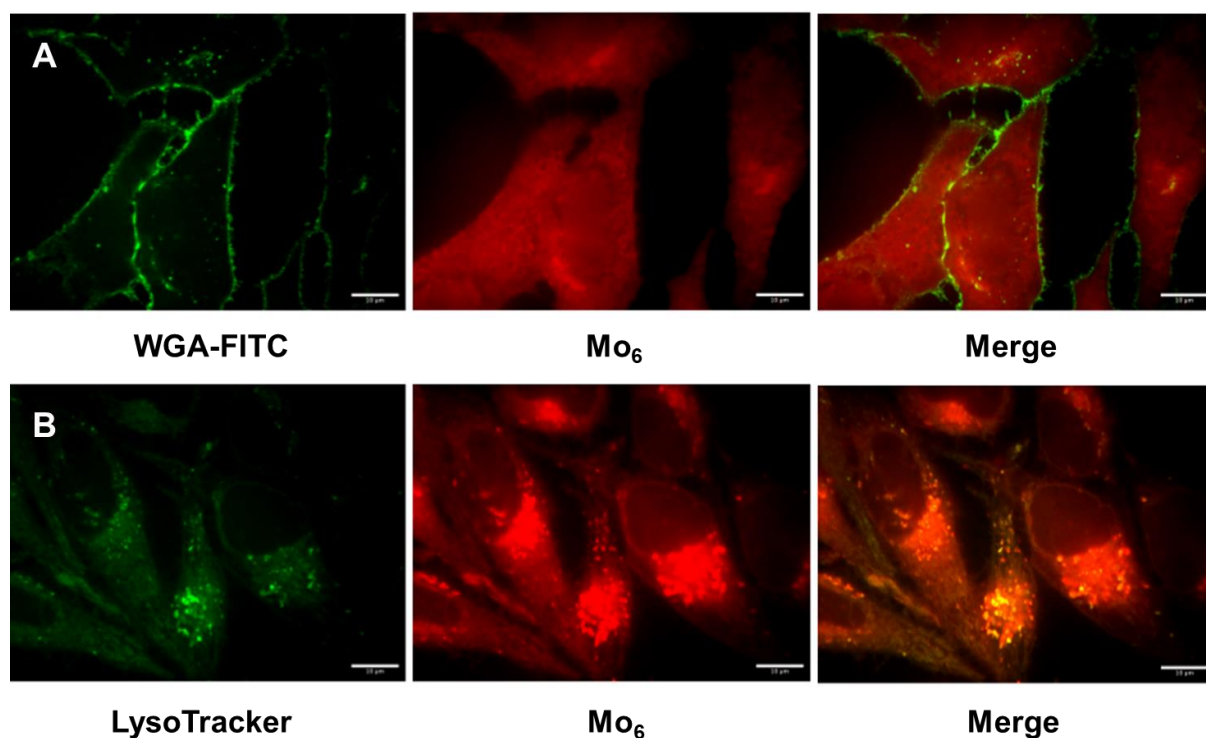

**Figure S7.** Radiotoxicity of **1** towards HeLa cells using an incubation concentration  $65 \mu\text{g mL}^{-1}$ , 24 h incubation in the full medium (5% FBS), irradiated with a X-RAD 225XL X-ray source (upper energy limit is 225 keV); \* represents statistically significant differences according to the Students's t-test ( $p < 0.05$ ).

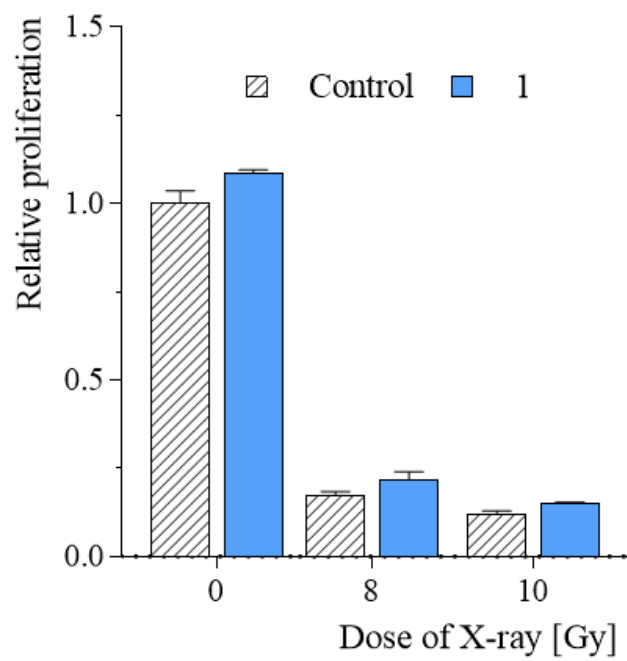

Supplement: d3ma00577a1.pdf [file d3ma00577a1.pdf]
